# Supplementary material for: Identification of Diagnostic Genes and Effective Drugs Associated with Osteoporosis Treatment by Single-Cell RNA-Seq Analysis and Network Pharmacology
Source: Hindawi journal article supplement (doi:10.1155/2022/6830635), 2022-09-25

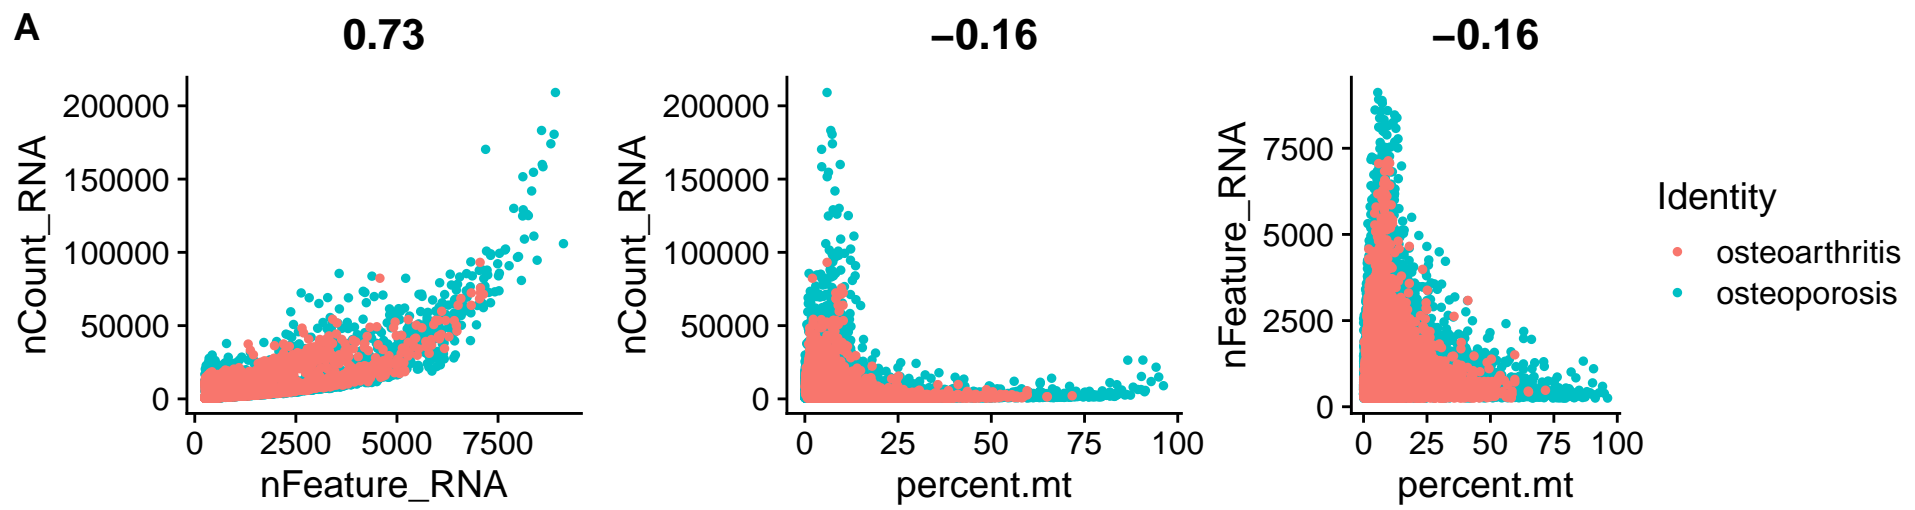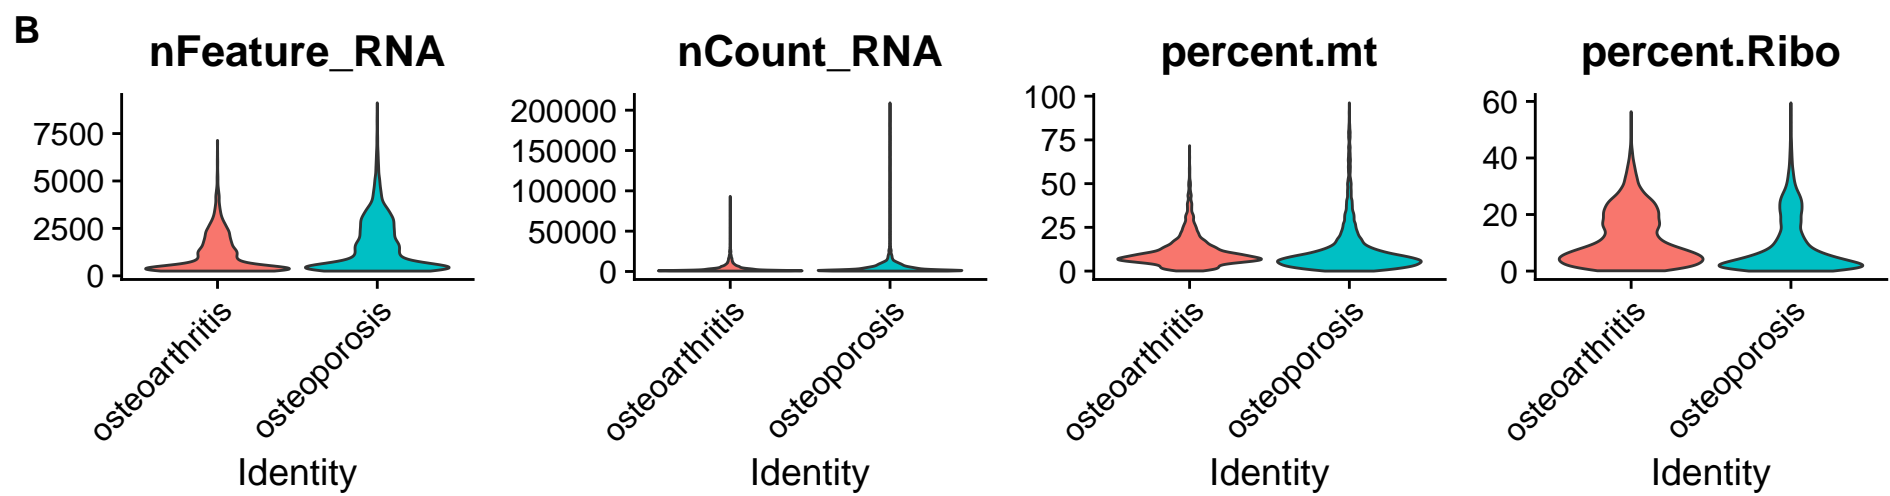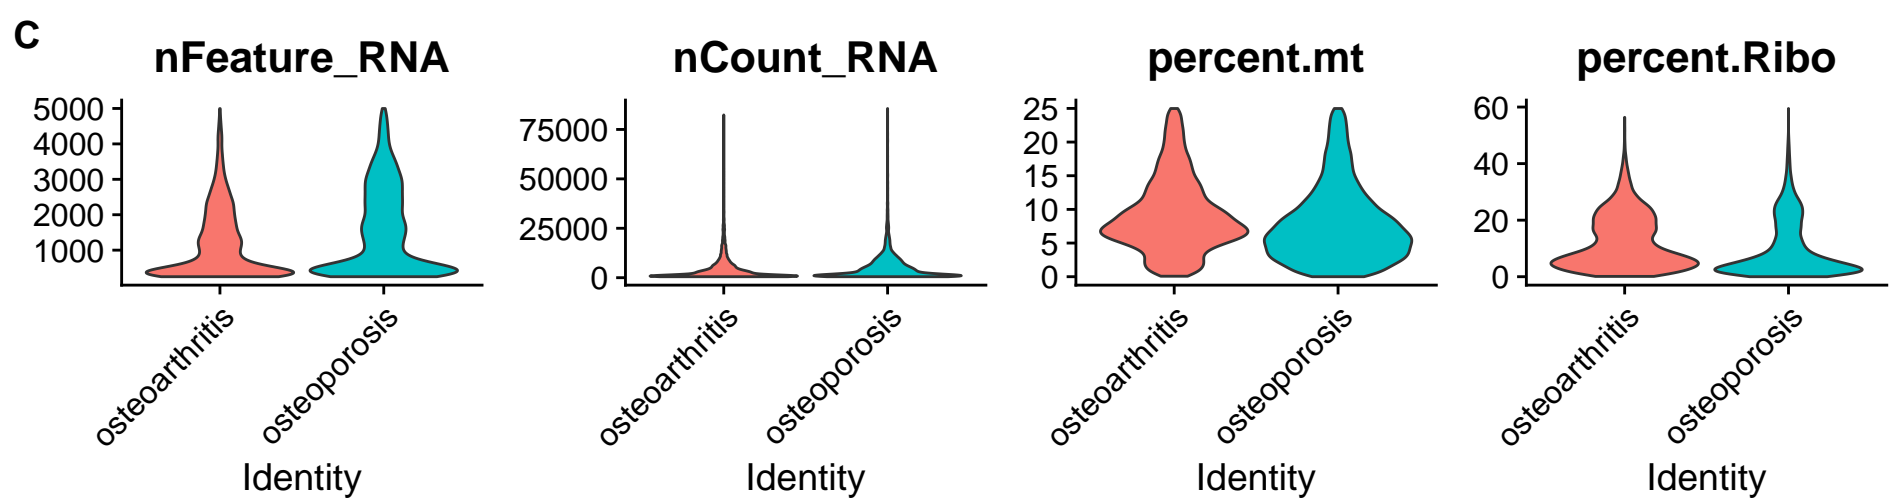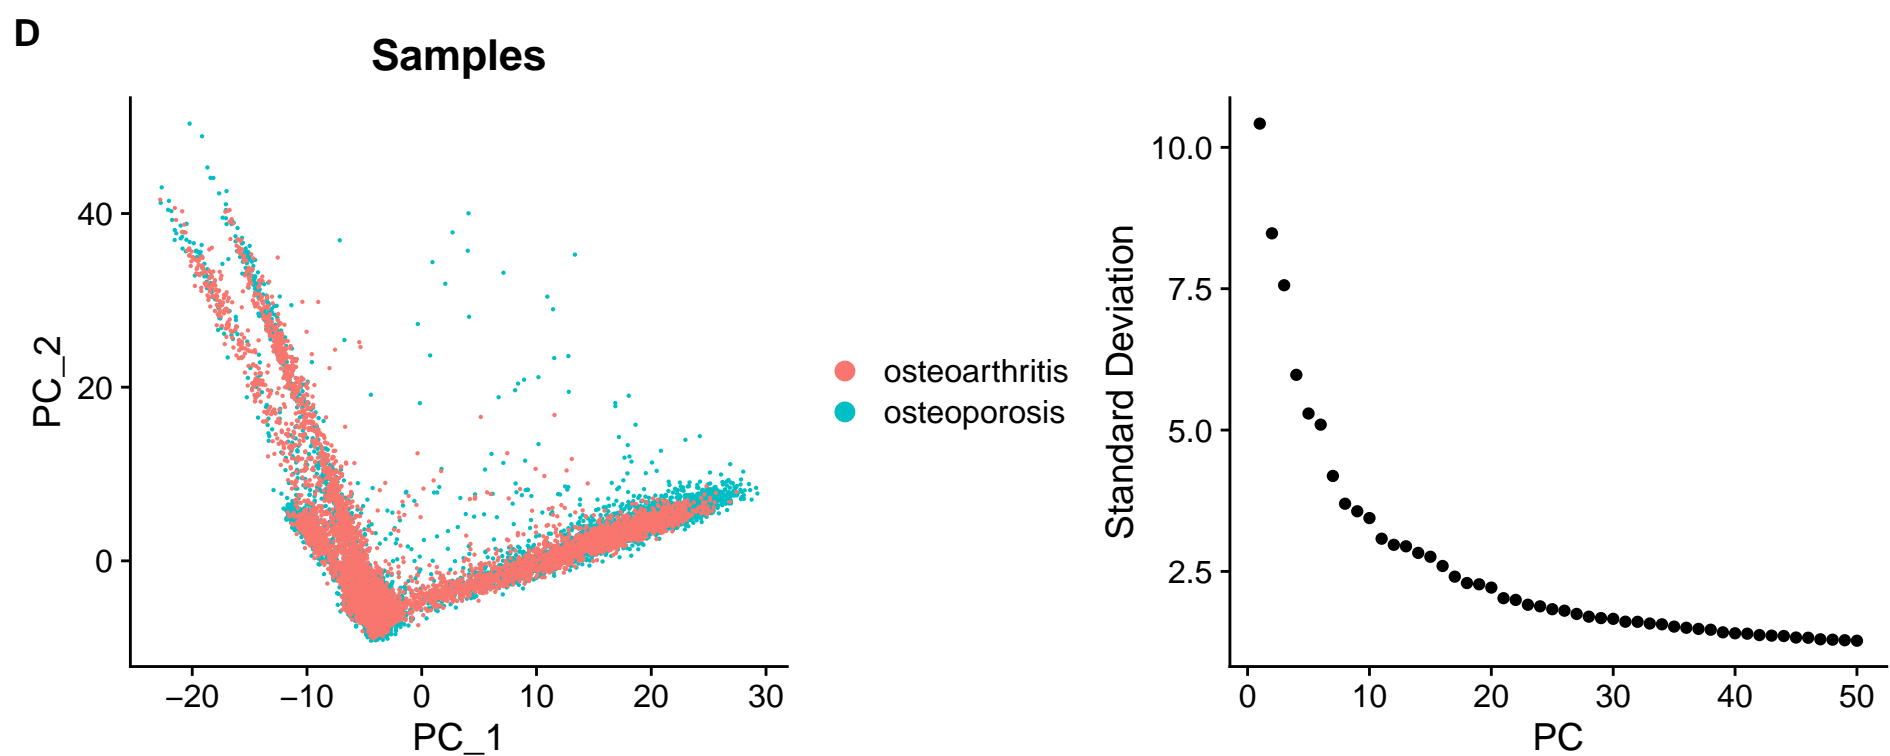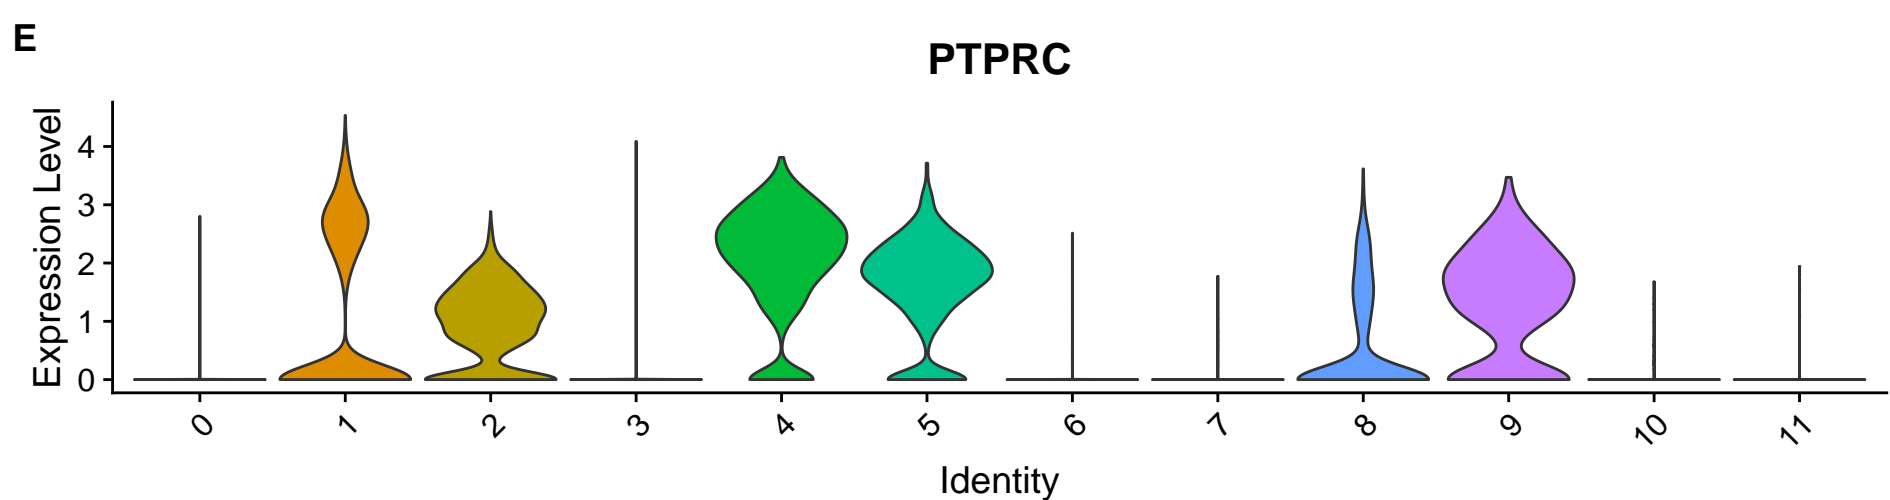

Supplement: f1 [file 6830635.f1.pdf]
